# Supplementary material for: Comparing Metabolomic and Essential Oil Fingerprints of Citrus australasica F. Muell (Finger Lime) Varieties and Their In Vitro Antioxidant Activity
Source: MDPI journal article supplement (doi:10.3390/antiox11102047), 2022-10-18
Supplement: s1 [file s1]

# **Comparing metabolomic and essential oil fingerprint of *Citrus australasica* F.Muell (finger lime) varieties and their *in vitro* antioxidant activity**

Emily Cioni<sup>1,†</sup>, Chiara Migone<sup>1,†</sup>, Roberta Ascrizzi<sup>1,2,3</sup>, Beatrice Muscatello<sup>1,3</sup>, Marinella De Leo<sup>1,2,3\*</sup>, Anna Maria Piras<sup>1,3</sup>, Ylenia Zambito<sup>1,2,3</sup>, Guido Flamini<sup>1,2,3</sup>, Luisa Pistelli<sup>1,2,3</sup>

<sup>1</sup> *Dipartimento di Farmacia, Università di Pisa, via Bonanno 33, 56126 Pisa, Italy*

<sup>2</sup> *Centro Interdipartimentale di Ricerca "Nutraceutica e Alimentazione per la Salute", via del Borghetto 80, Università di Pisa, 56124 Pisa, Italy*

<sup>3</sup> *Centro per l'Integrazione della Strumentazione dell'Università di Pisa (CISUP), Lungarno Pacinotti 43, 56126 Pisa, Italy*

<sup>†</sup> These authors equally contributed

\* Corresponding author.

*Full postal address:* Dipartimento di Farmacia, Università di Pisa, via Bonanno 33, 56126 Pisa, Italy

*E-mail address:* marinella.deleo@unipi.it

*Phone:* 0039 050 2219706

**Table S1.** Results of peel and pulp extraction from *Citrus australasica* varieties.

| Finger lime peel         |       |          |          |                 |           |
|--------------------------|-------|----------|----------|-----------------|-----------|
|                          | Red   | Pink Ice | Collette | Yellow-Sunshine | Faustrime |
| FW (g)                   | 2.9   | 4.6      | 5.6      | 2.4             | 11.8      |
| DW (g)                   | 0.7   | 0.9      | 1.6      | 0.6             | 2.5       |
| R <sub>E</sub> (mg)      | 3.2   | 5.8      | 21.5     | 3.0             | 12.6      |
| R <sub>M</sub> (mg)      | 199.7 | 297.1    | 515.1    | 144.8           | 663.5     |
| R <sub>M</sub> yield (%) | 28.5  | 33.0     | 32.2     | 24.1            | 26.5      |
| Finger lime pulp         |       |          |          |                 |           |
| FW (g)                   | 7.1   | 7.0      | 2.0      | 3.1             | 13.2      |
| DW (g)                   | 0.7   | 0.7      | 0.3      | 0.3             | 1.2       |
| R <sub>E</sub> (mg)      | 1.7   | 2.2      | 5.9      | 1.1             | 4.5       |
| R <sub>M</sub> (mg)      | 432.4 | 382.3    | 121.9    | 104.3           | 718.7     |
| R <sub>M</sub> yield (%) | 61.8  | 54.6     | 40.6     | 34.8            | 59.9      |

DW = dry weight; FW = fresh weight; R<sub>E</sub> = *n*-hexane extract; R<sub>M</sub> = methanolic extract.

**Table S2.** Concentrations of peel and pulp extracts from *Citrus australasica* varieties applied in the *in vitro* assay of protection from H<sub>2</sub>O<sub>2</sub> oxidative stress on Balb/3T3.

| <b>Finger lime peel</b> |            |                 |                 |                        |                  |
|-------------------------|------------|-----------------|-----------------|------------------------|------------------|
|                         | <b>Red</b> | <b>Pink Ice</b> | <b>Collette</b> | <b>Yellow Sunshine</b> | <b>Faustrime</b> |
| Concentration           | 31.5       | 40.3            | 43.6            | 35.4                   | 54.2             |
| (µg/mL)                 | 15.8       | 20.2            | 21.8            | 17.7                   | 27.1             |
|                         | 7.9        | 10.1            | 10.9            | 8.9                    | 13.6             |
| <b>Finger lime pulp</b> |            |                 |                 |                        |                  |
|                         | <b>Red</b> | <b>Pink Ice</b> | <b>Collette</b> | <b>Yellow Sunshine</b> | <b>Faustrime</b> |
| Concentration           | 124.6      | 85.8            | 73.1            | 132.8                  | 191.9            |
| (µg/mL)                 | 62.3       | 42.9            | 36.6            | 66.4                   | 96.0             |
|                         | 31.2       | 21.5            | 18.3            | 33.2                   | 48.0             |
